# Supplementary material for: Tailoring thermal expansion and luminescence thermometric performance of KMgScW3O12-based compounds
Source: Royal Society of Chemistry journal article supplement (doi:10.1039/d4tc00711e), 2024-01-01
Supplement: d4tc00711e1.pdf [file d4tc00711e1.pdf]

## Supplementary Information

### Tailoring thermal expansion and luminescence thermometric performance of KMgScW<sub>3</sub>O<sub>12</sub>-based compounds

Ming Li<sup>1</sup>, Qi Miao<sup>1</sup>, Kaiyue Zhao<sup>1</sup>, Yangke Cun<sup>\*2</sup>, Yongqiang Qiao<sup>1</sup>, Juan Guo<sup>1</sup>,  
Li Li<sup>\*3</sup> and Qilong Gao<sup>\*1</sup>

<sup>1</sup> School of Physics and Microelectronics, Zhengzhou University, Zhengzhou, 450001, China

<sup>2</sup> College of Materials Science and Engineering, Kunming University of Science and Technology, Kunming 650093, China

<sup>3</sup> College of Science, Chongqing University of Posts and Telecommunications, Chongqing 400065, P. R. China

\*E-mail: [cunyangke@126.com](mailto:cunyangke@126.com); [lilic@cqupt.edu.cn](mailto:lilic@cqupt.edu.cn); [qilonggao@zzu.edu.cn](mailto:qilonggao@zzu.edu.cn)

#### 1. Experiment and data analysis details

**Materials Synthesis.** We used the high-temperature solid-state method to synthesize (KMg)<sub>x</sub>Sc<sub>1.82-x</sub>W<sub>3</sub>O<sub>12</sub>: 0.15Yb/0.03Er samples, which were not pure when  $x < 0.4$ . The raw materials are K<sub>2</sub>CO<sub>3</sub> (99%, Macklin), MgO (99%, Macklin), Sc<sub>2</sub>O<sub>3</sub> (99.99%, Macklin), WO<sub>3</sub> (99%, Macklin), Yb<sub>2</sub>O<sub>3</sub> (99.99%, Macklin), Er<sub>2</sub>O<sub>3</sub> (99.99%, Macklin). The raw material mixture was ground in a mortar for 2 h according to the molar ratio, and then the powder sample was poured into a Pt crucible, sintered in a Muffle furnace at 873 K for 6 h, and then cooled to room temperature (RT) naturally. The obtained sample was ground again for 2 h and pressed into cylindrical pellets with a diameter of 8 mm, and sintered at a high temperature of 1223 K for 24 h to obtain a pure target product.

**Sample Characterizations.** XRD was measured with Cu K $\alpha$  using the Rigaku diffractometer (Japan, Smart Lab 3 KW,  $\lambda = 1.5406 \text{ \AA}$ ). Variable-temperature XRD diffraction data were collected at 0.01° steps in the  $2\theta$  range of 10-120°. The crystal structure of the sample was mapped by VESTA software. Temperature-dependent Raman spectrum (wavelength of excitation 633 nm, RT-700 K) was recorded using a Raman spectrometer (France, HORIBA, Lab RAM HR Evolution). The surface morphology was measured using field emission scanning electron microscopy (SEM, Zeiss/Auriga FIB). FEI Talos F200S was used to observe the element distribution of the sample by high-resolution transmission electron microscopy (HRTEM). X-ray

photoelectron spectroscopy (XPS) data were acquired with Al K $\alpha$  radiation (Escalab 250Xi) and corrected with C 1s spectral lines (284.8 eV). The thermal stability of the sample was tested by a Mettler DSC3 differential scanning calorimeter at a temperature rise rate of 10 K/min. A spectrophotometer (Cary 5000 UV-Vis-NIR, America) was used to record the UV/Vis spectra. The temperature-dependent photoluminescence emission spectrum and decay curve were measured using the Edinburgh FLS1000 steady-state fluorescence spectrometer connected to a temperature controller (HFS600E-PB2)

**Computational methods.** All calculations were performed using first principles method based on density functional theory (DFT) as implemented in the Vienna *ab initio* simulation package (VASP).<sup>1</sup> The projector augmented wave (PAW) method was used to describe the ion-electron interaction.<sup>2</sup> The generalized gradient approximation (GGA) function of Perdew, Burke, and Ernzerhof (PBE) was used to describe the exchange and correlation effects. A plane-wave energy cutoff of 550 eV was used here,<sup>3</sup> with a  $6 \times 6 \times 6$  Monkhorst-Pack  $k$ -point mesh to sample the Brillouin zone. The convergence values were set to  $10^{-8}$  eV/atom for the calculation of the total energy, to  $10^{-4}$  eV/atom for the residual forces during the structure relaxation.<sup>4</sup>

## 2. Supplementary Figures and Tables

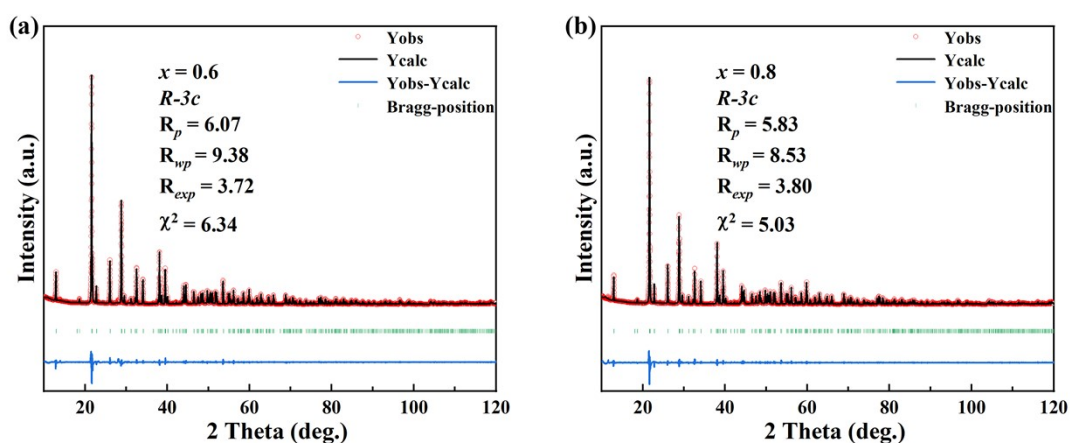

Fig.S1. Rietveld refinement results of XRD pattern at RT of (a) KM6 sample and (b) KM8 sample.

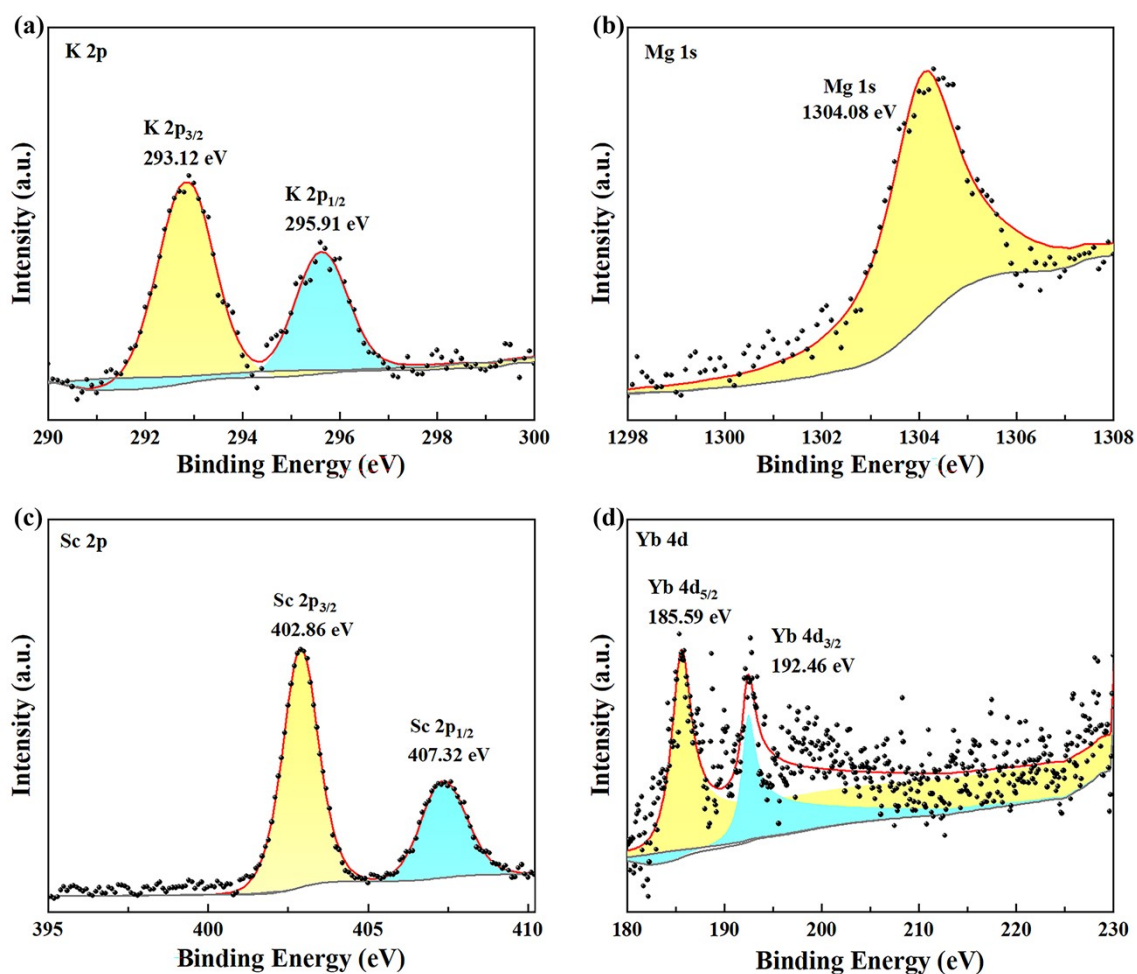

Fig.S2. XPS spectra of KM4 sample. (a) K 2p peaks. (b) Mg 1s peak. (c) Sc 2p peaks. (d) Yb 4d peaks.

The two peaks observed in the K 2p XPS spectra of the sample at 295.91 eV and 293.12 eV belong to K  $2p_{1/2}$  and K  $2p_{3/2}$ , respectively, indicating the presence of K element in the sample as a +1 valence state. The Mg 1s peak is located at 1304.08 eV, indicating that the valence state of Mg is +2. Sc 2p also splits into two peaks with binding energies of 407.32 eV and 402.86 eV respectively, belonging to Sc  $2p_{1/2}$  and Sc  $2p_{3/2}$ , indicating that Sc is in a +3 valence state. Yb 4d also observed two peaks at 192.46 eV and 185.59 eV, belonging to Yb  $4d_{1/2}$  and Yb  $4d_{5/2}$ , respectively, indicating that Yb exists in the sample as a +3 valence state.

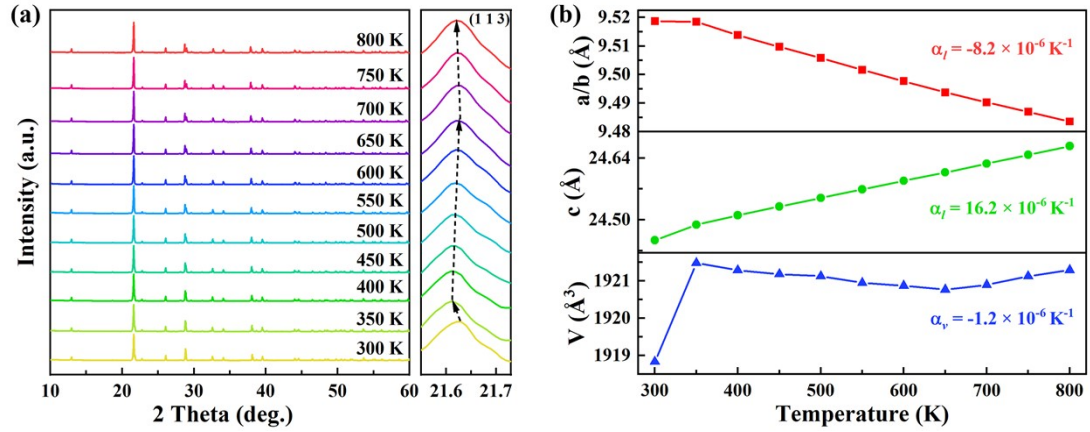

Fig.S3. (a) Temperature-dependent XRD patterns and local amplification of KM6 sample (300-800 K). (b) Temperature dependence of lattice parameters and unit cell volume of KM6 sample.

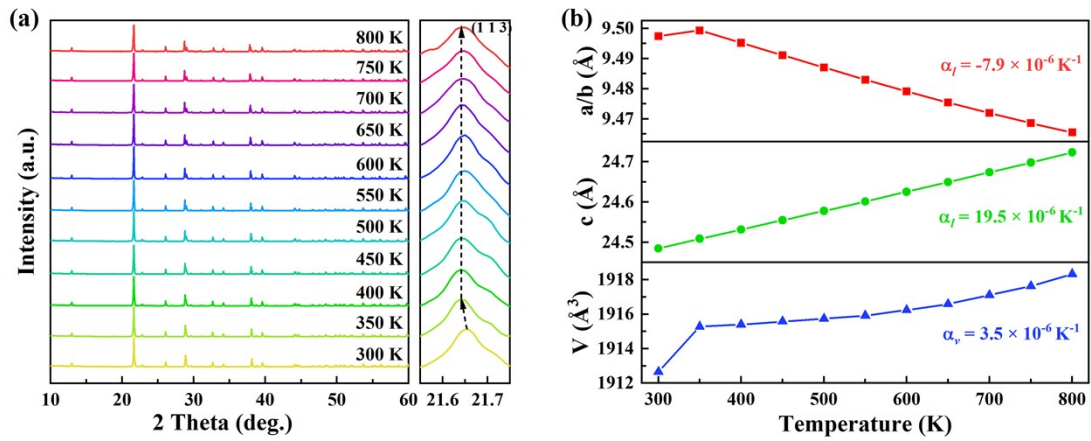

Fig.S4. (a) Temperature-dependent XRD patterns and local amplification of KM8 sample (300-800 K). (b) Temperature dependence of lattice parameters and unit cell volume of KM8 sample.

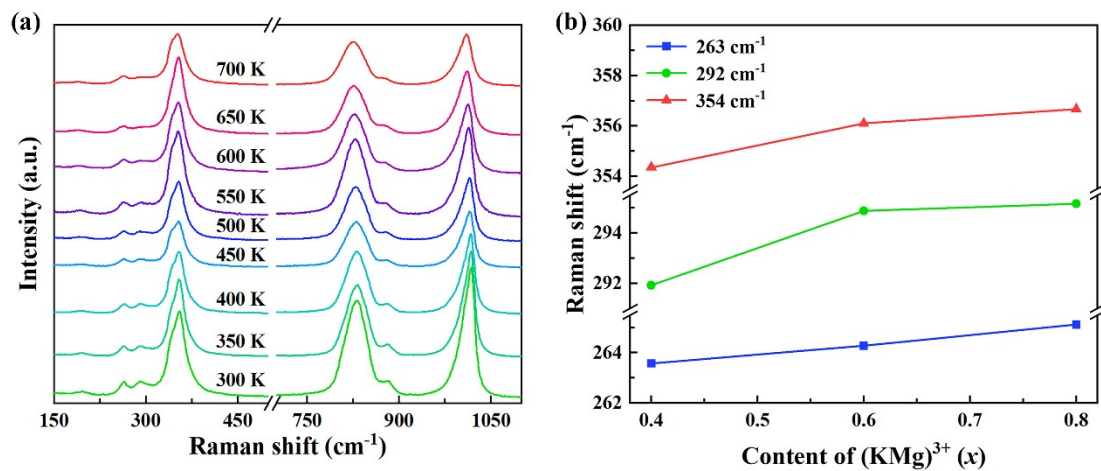

Fig.S5. (a) Raman spectra of KM4 at different temperatures. (b) The frequency shifts of Raman modes corresponding to KM4, KM6 and KM8 samples change with (KMg)<sup>3+</sup>

ions at RT.

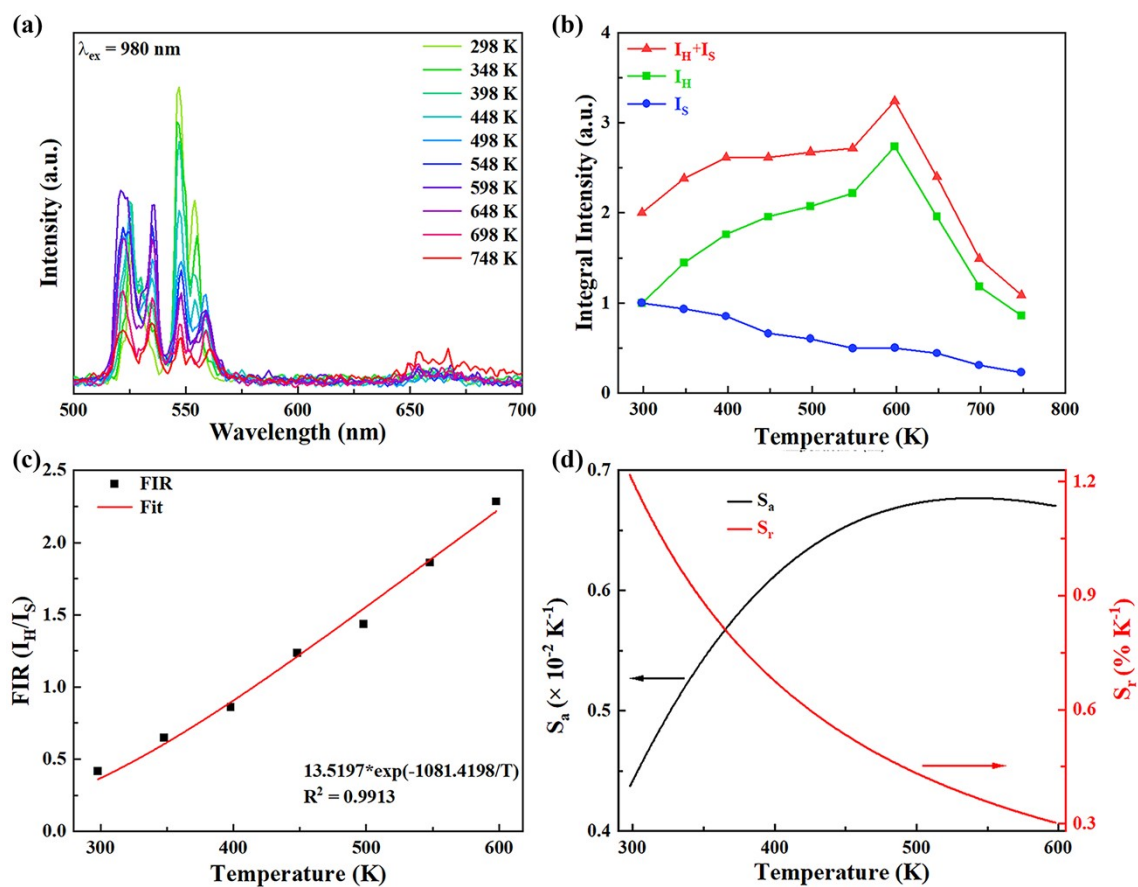

Fig.S6. (a) UCL emission spectra of KM6 sample at 298-748 K under 980 nm laser excitation. (b) The corresponding UCL emission integral intensities of  ${}^2H_{11/2(2)}/{}^2H_{11/2(1)}$ ,  ${}^4S_{3/2(2)}/{}^4S_{3/2(1)}$  and total ( ${}^2H_{11/2} + {}^4S_{3/2}$ ) levels of  $Er^{3+}$  ions. (c) The relationships between FIR values and sample temperature. (d) The absolute sensitivity  $S_a$  and relative sensitivity  $S_r$  curves.

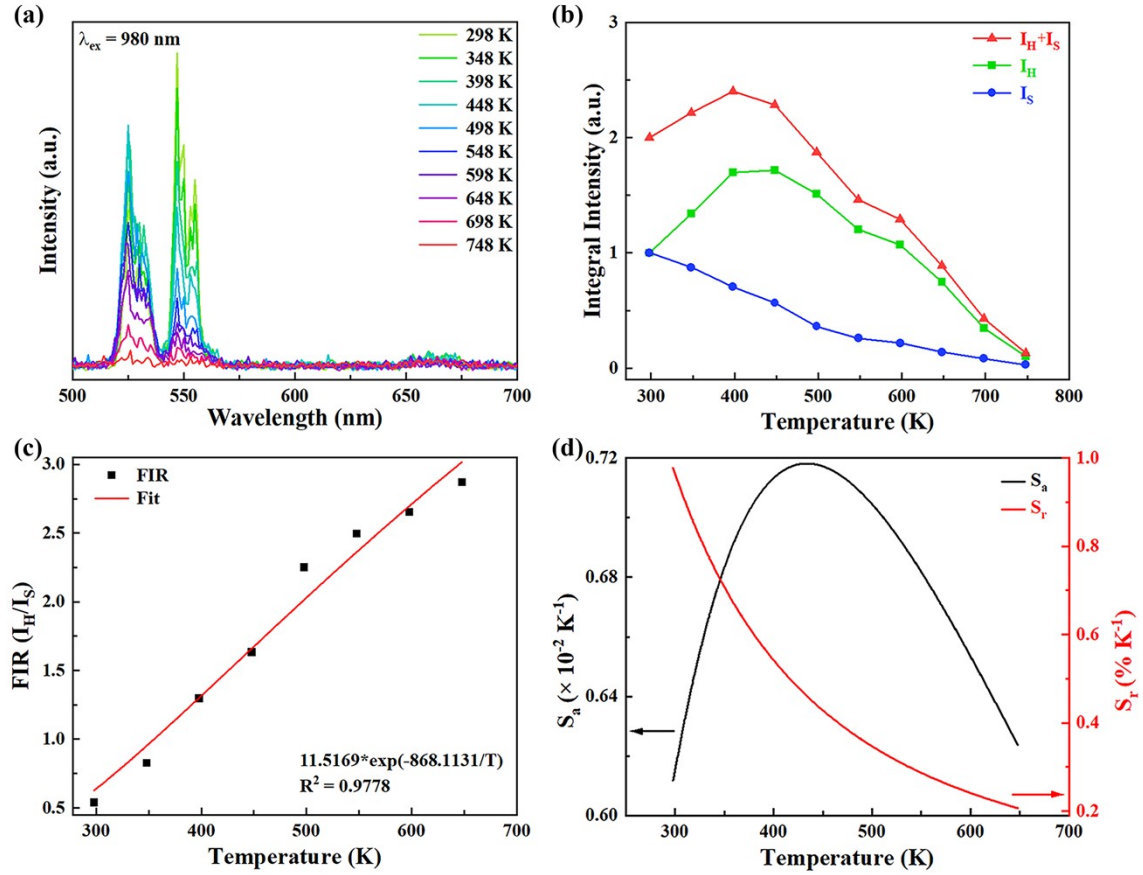

Fig.S7. (a) UCL emission spectra of KM8 sample at 298-748 K under 980 nm laser excitation. (b) The corresponding UCL emission integral intensities of  ${}^2\text{H}_{11/2(2)}/{}^2\text{H}_{11/2(1)}$ ,  ${}^4\text{S}_{3/2(2)}/{}^4\text{S}_{3/2(1)}$  and total ( ${}^2\text{H}_{11/2} + {}^4\text{S}_{3/2}$ ) levels of  $\text{Er}^{3+}$  ions. (c) The relationships between FIR values and sample temperature. (d) The absolute sensitivity  $S_a$  and relative sensitivity  $S_r$  curves.

Table S1. The lattice parameters obtained by the XRD refinement of KM4 sample.

| Temperature<br>(K) | Lattice parameters |               |                       |
|--------------------|--------------------|---------------|-----------------------|
|                    | $a/b$ (Å)          | $c$ (Å)       | $V$ (Å <sup>3</sup> ) |
| 300                | 9.53897 (8)        | 24.41263 (23) | 1923.748 (29)         |
| 350                | 9.53780 (8)        | 24.46324 (23) | 1927.262 (29)         |
| 400                | 9.53271 (8)        | 24.48368 (25) | 1926.813 (30)         |
| 450                | 9.52867 (8)        | 24.49965 (25) | 1926.439 (30)         |
| 500                | 9.52483 (8)        | 24.51474 (25) | 1926.073 (31)         |
| 550                | 9.52089 (8)        | 24.52910 (25) | 1925.607 (31)         |
| 600                | 9.51726 (9)        | 24.54392 (26) | 1925.301 (32)         |
| 650                | 9.51367 (9)        | 24.55885 (27) | 1925.019 (34)         |
| 700                | 9.51005 (9)        | 24.57264 (28) | 1924.632 (35)         |
| 750                | 9.50683 (10)       | 24.58739 (29) | 1924.487 (36)         |
| 800                | 9.50365 (10)       | 24.60163 (31) | 1924.312 (38)         |

Table S2. The structural parameters obtained by the XRD refinement of KM4 sample at 300 K.

| Atom                       | <i>x</i> | <i>y</i> | <i>z</i>      | <i>Occ.</i> |
|----------------------------|----------|----------|---------------|-------------|
| K (6b)                     | 0.00000  | 0.00000  | 0.00000       | 0.400       |
| Sc5/Mg4 (12c)              | 0.00000  | 0.00000  | 0.13978       | 1.600/0.400 |
| W3 (18e)                   | 0.28116  | 0.00000  | 0.25000       | 3.000       |
| O1 (36f)                   | 0.04890  | 0.19210  | 0.18520       | 6.000       |
| O2 (36f)                   | 0.17340  | 0.13380  | 0.09720       | 6.000       |
| Yb (12c)                   | 0.00000  | 0.00000  | 0.13978       | 1.600/0.400 |
| Er (12c)                   | 0.00000  | 0.00000  | 0.13978       | 1.600/0.400 |
| <i>a/b</i> (Å)             |          |          | 9.538970      |             |
| <i>c</i> (Å)               |          |          | 24.412630     |             |
| <i>V</i> (Å <sup>3</sup> ) |          |          | 1923.748 (29) |             |
| <i>R<sub>p</sub></i> (%)   |          |          | 5.77          |             |
| <i>R<sub>exp</sub></i> (%) |          |          | 3.65          |             |

Table S3. The structural parameters obtained by the XRD refinement of KM4 sample at 800 K.

| Atom                       | <i>x</i> | <i>y</i> | <i>z</i>      | <i>Occ.</i> |
|----------------------------|----------|----------|---------------|-------------|
| K (6b)                     | 0.00000  | 0.00000  | 0.00000       | 0.400       |
| Sc5/Mg4 (12c)              | 0.00000  | 0.00000  | 0.14210       | 1.600/0.400 |
| W3 (18e)                   | 0.28116  | 0.00000  | 0.25000       | 3.000       |
| O1 (36f)                   | 0.05560  | 0.19920  | 0.18940       | 6.000       |
| O2 (36f)                   | 0.18350  | 0.13880  | 0.09470       | 6.000       |
| Yb (12c)                   | 0.00000  | 0.00000  | 0.14210       | 1.600/0.400 |
| Er (12c)                   | 0.00000  | 0.00000  | 0.14210       | 1.600/0.400 |
| <i>a/b</i> (Å)             |          |          | 9.503650      |             |
| <i>c</i> (Å)               |          |          | 24.601633     |             |
| <i>V</i> (Å <sup>3</sup> ) |          |          | 1924.312 (38) |             |
| <i>R<sub>p</sub></i> (%)   |          |          | 5.50          |             |
| <i>R<sub>exp</sub></i> (%) |          |          | 3.68          |             |

Table S4. The bond angles obtained by the XRD refinement of KM4 sample.

| Temperature<br>(K) | Bond angles (°) |           |
|--------------------|-----------------|-----------|
|                    | Sc5–O1–W3       | Sc5–O2–W3 |
| 300                | 147.0 (4)       | 152.3 (6) |
| 350                | 146.8 (4)       | 151.6 (6) |
| 400                | 146.7 (4)       | 150.2 (6) |
| 450                | 146.5 (4)       | 149.7 (6) |
| 500                | 146.1 (4)       | 149.4 (6) |
| 550                | 145.8 (4)       | 149.0 (6) |
| 600                | 145.7 (5)       | 148.1 (6) |
| 650                | 144.9 (5)       | 147.8 (6) |
| 700                | 144.4 (5)       | 146.7 (6) |
| 750                | 144.4 (5)       | 147.0 (6) |
| 800                | 143.2 (5)       | 145.8 (6) |

Table S5. The interatomic distance of between the closest identical atoms obtained by the XRD refinement of KM4 sample.

| Temperature<br>(K) | Interatomic distance (Å) |            |
|--------------------|--------------------------|------------|
|                    | Sc5–Sc5                  | W3–W3      |
| 300                | 5.6630 (2)               | 4.9487 (3) |
| 350                | 5.6570 (2)               | 4.9560 (3) |
| 400                | 5.6516 (19)              | 4.9585 (3) |
| 450                | 5.6478 (19)              | 4.9599 (3) |
| 500                | 5.6450 (2)               | 4.9610 (3) |
| 550                | 5.6400 (2)               | 4.9624 (3) |
| 600                | 5.6380 (2)               | 4.9639 (3) |
| 650                | 5.6330 (2)               | 4.9652 (3) |
| 700                | 5.6300 (2)               | 4.9666 (3) |
| 750                | 5.6250 (2)               | 4.9679 (3) |
| 800                | 5.6200 (2)               | 4.9692 (3) |

Table S6. The total anharmonicity has been determined from the temperature-dependency of the Raman frequencies shown in Figure 4(d).

| Mode frequency $\omega_i$ (cm <sup>-1</sup> ) | $\frac{\partial \omega_i}{(\partial T)_p}$ (cm <sup>-1</sup> K <sup>-1</sup> ) | Total anharmonicity ( $\times 10^{-5}$ K <sup>-1</sup> ) |
|-----------------------------------------------|--------------------------------------------------------------------------------|----------------------------------------------------------|
| 264.0                                         | -0.00169                                                                       | -0.64                                                    |
| 291.9                                         | 0.00313                                                                        | 1.07                                                     |
| 340.6                                         | 0.00373                                                                        | 1.10                                                     |
| 354.3                                         | -0.00262                                                                       | -0.74                                                    |
| 831.1                                         | -0.01358                                                                       | -1.63                                                    |
| 885.4                                         | -0.01228                                                                       | -1.39                                                    |
| 1014.5                                        | -0.01693                                                                       | -0.17                                                    |



Table S7. Temperature sensing performance of rare earth ions activated luminescent material thermometer.

| Materials                                                                                               | Temperature range (K) | S <sub>a</sub> max<br>(× 10 <sup>-2</sup> K <sup>-1</sup> ) | S <sub>r</sub> max<br>(% K <sup>-1</sup> ) | Ref.      |
|---------------------------------------------------------------------------------------------------------|-----------------------|-------------------------------------------------------------|--------------------------------------------|-----------|
| Gd <sub>0.33</sub> (SiO <sub>4</sub> ) <sub>6</sub> O <sub>2</sub> : Yb <sup>3+</sup> /Er <sup>3+</sup> | 298-548               | 0.46                                                        | -                                          | 5         |
| NaLuF <sub>4</sub> : Eu <sup>3+</sup> @g-C <sub>3</sub> N <sub>4</sub>                                  | 303-503               | 0.57                                                        | 0.46                                       | 6         |
| BaY <sub>2</sub> O <sub>4</sub> : Er <sup>3+</sup> /Yb <sup>3+</sup>                                    | 298-573               | 0.19                                                        | -                                          | 7         |
| Ca <sub>8</sub> ZnLa(PO <sub>4</sub> ) <sub>7</sub> : Tb <sup>3+</sup> /Eu <sup>3+</sup>                | 298-448               | -                                                           | 0.53                                       | 8         |
| Na <sub>0.5</sub> Bi <sub>0.5</sub> TiO <sub>3</sub> : Er <sup>3+</sup>                                 | 93-553                | 0.35                                                        | -                                          | 9         |
| Zn <sub>3</sub> Mo <sub>2</sub> O <sub>9</sub> : Er <sup>3+</sup>                                       | 373-573               | 0.60                                                        | 0.72                                       | 10        |
| (KMg) <sub>0.4</sub> Sc <sub>1.42</sub> W <sub>3</sub> O <sub>12</sub> :<br>0.15Yb/0.03Er               | 298-748               | 0.50                                                        | 0.86                                       | This work |

## References

- 1 L. H. N. Rimmer, M. T. Dove, A. L. Goodwin and D. C. Palmer, *Phys. Chem. Chem. Phys.*, 2014, **16**, 21144-21152.
- 2 G. Kresse and D. Joubert, *Phys. Rev. B*, 1999, **59**, 1758-1775.
- 3 Z. Wang, F. Wang, L. Wang, Y. Jia and Q. Sun, *J. Appl. Phys.*, 2013, **114**.
- 4 M. K. Gupta, B. Singh, R. Mittal, S. Rols and S. L. Chaplot, *Phys. Rev. B*, 2016, **93**.
- 5 J. Zhang and F. Qian, *Dalton T.*, 2020, **49**, 10949-10957.
- 6 P. Du, J. Tang, W. Li and L. Luo, *Chem. Eng. J.*, 2021, **406**, 127165.
- 7 G. Xiang, X. Liu, Q. Xia, S. Jiang, X. Zhou, L. Li, Y. Jin, L. Ma, X. Wang and J. Zhang, *Inorg. Chem.*, 2020, **59**, 11054-11060.
- 8 L. Li, X. Tang, Z. Wu, Y. Zheng, S. Jiang, X. Tang, G. Xiang and X. Zhou, *J. Alloys Compd.*, 2019, **780**, 266-275.
- 9 P. Du and J. S. Yu, *Ceram. Int.*, 2015, **41**, 6710-6714.
- 10 H. Liu, H. Wang, X. Zheng, P. Wang and Y. Zhang, *Dalton T.*, 2022, **51**, 13106-13118.
